# Supplementary material for: Metal maps of sclerotic hippocampi of patients with mesial temporal lobe epilepsy
Source: Royal Society of Chemistry journal article supplement (doi:10.1039/c6mt00293e), 2017-01-01
Supplement: c6mt00293e1.pdf [file c6mt00293e1.pdf]

## **Electronic Supplementary Information**

**Metal maps of sclerotic hippocampi of patients with mesial temporal lobe epilepsy**

Opačić et al.

**Table S1.** Clinical characteristics of the analyzed patients.

| <b>Patient</b>                            | <b>1</b>                             | <b>2</b>                             | <b>3</b>                             | <b>4</b>                             |
|-------------------------------------------|--------------------------------------|--------------------------------------|--------------------------------------|--------------------------------------|
| <b>Sex</b>                                | F                                    | F                                    | M                                    | M                                    |
| <b>Age (years)</b>                        | 33                                   | 41                                   | 27                                   | 40                                   |
| <b>Epilepsy onset (years)</b>             | 26                                   | 7                                    | 2                                    | 9                                    |
| <b>Febrile Seizures</b>                   | Yes                                  | No                                   | No                                   | Yes                                  |
| <b>H of SE</b>                            | No                                   | No                                   | No                                   | No                                   |
| <b>sGTCS fr.</b>                          | 1/LT                                 | 2/LT                                 | 0/LT                                 | 0/LT                                 |
| <b>FCS fr.</b>                            | W                                    | W                                    | W                                    | W                                    |
| <b>Antiepileptic drugs trials</b>         | PHB, CBZ, LTG, TPM, LEV              | OHB, CBZ, LTG, LEV                   | PHB, CBZ, VPA, LTG, TPM, LEV, PGB    | PHB, CBZ, VPA, LTG, TPM, CLO, LEV    |
| <b>Seizure classification<sup>a</sup></b> | Epigastric aura<br>Dialeptic seizure | Epigastric aura<br>Automotor seizure | Epigastric aura<br>Automotor seizure | Epigastric aura<br>Automotor seizure |
| <b>AH (side)</b>                          | R                                    | R                                    | L                                    | L                                    |
| <b>Follow up (months)</b>                 | 32                                   | 34                                   | 32                                   | 33                                   |
| <b>Outcome<sup>b</sup></b>                | 1                                    | 1                                    | 1                                    | 1                                    |
| <b>HS<sup>c</sup></b>                     | Type 2                               | Type 2                               | Type 1                               | Type 1                               |

**Abbreviations:** H of SE – History of Status Epilepticus, sGTCS fr. – secondary generalized tonic-clonic seizures frequency, FCS fr. – Focal complex seizures frequency, AH – amygdalohypocampectomy, LT – Life time, L – left, R – right, PHB – Phenobarbital, PHT – Phenytoin, CBZ – Carbamazepine, VPA – Valproic acid, LTG – Lamotrigine, TPM – Topiramate, LEV – Levetiracetam, CLO – Clobazam, PGB – Pregabalin

<sup>a</sup> Lüders H, Acharya J, Baumgartner C, et al. Semiological seizure classification. *Epilepsia* 1998;39:1006–1013

<sup>b</sup> Wieser HG, Blume WT, Fish D, et al. ILAE Commission Report. Proposal for a new classification of outcome with respect to epileptic seizures following epilepsy surgery. *Epilepsia* 2001;42:282–286.

<sup>c</sup> Blümcke I, Thom M, Aronica E, et al. International consensus classification of hippocampal sclerosis in temporal lobe epilepsy: A Task Force report from the ILAE Commission on Diagnostic Methods. *Epilepsia* 2013;54:1315–1329

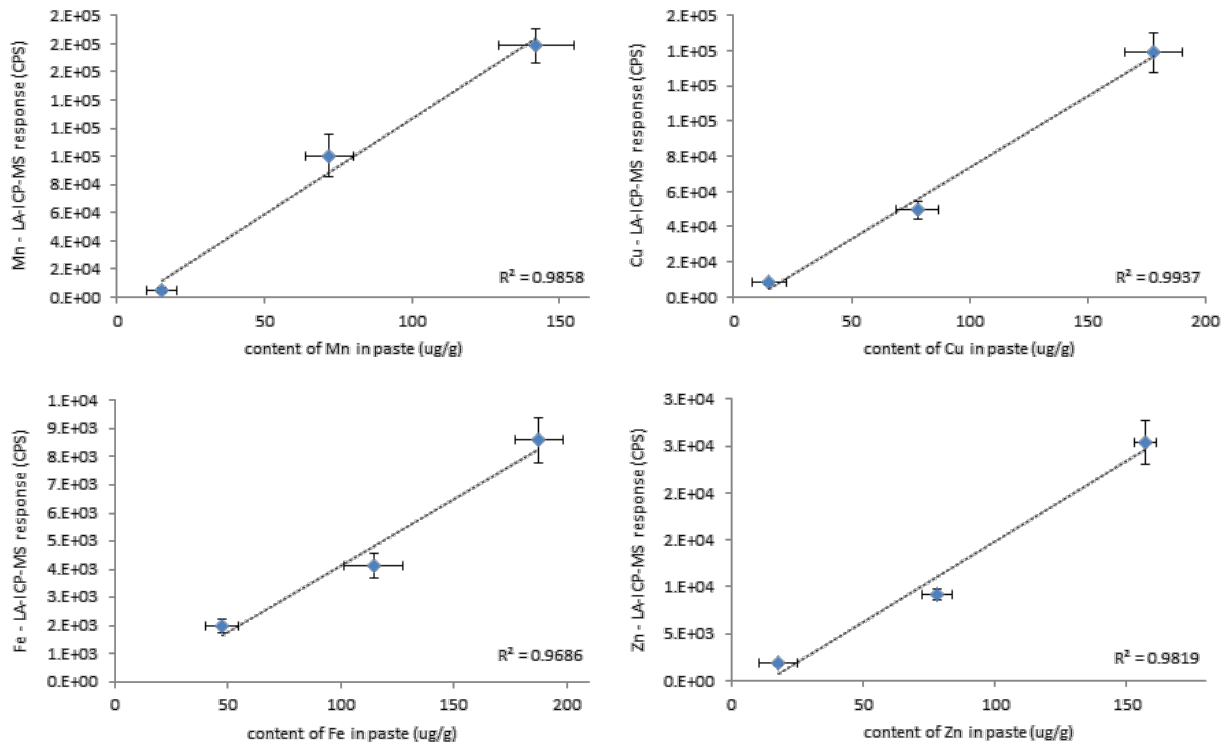

**Figure S1.** Standardization of LA-ICP-MS imaging procedure. Calibration graphs for Mn, Fe, Cu and Zn. X-axis data are elemental contents in spiked rat brain pastes, determined by microwave digestion and solution ICP-MS analysis; Y-axis data are average responses (in CPS) of 5 lines scanned by LA-ICP-MS analyses of cryo-cuts of spiked rat brain pastes. Error bars represent standard deviations.

### Patient 2 (HS2)

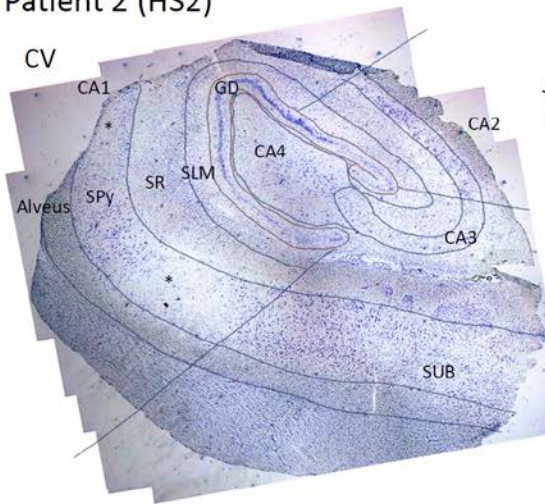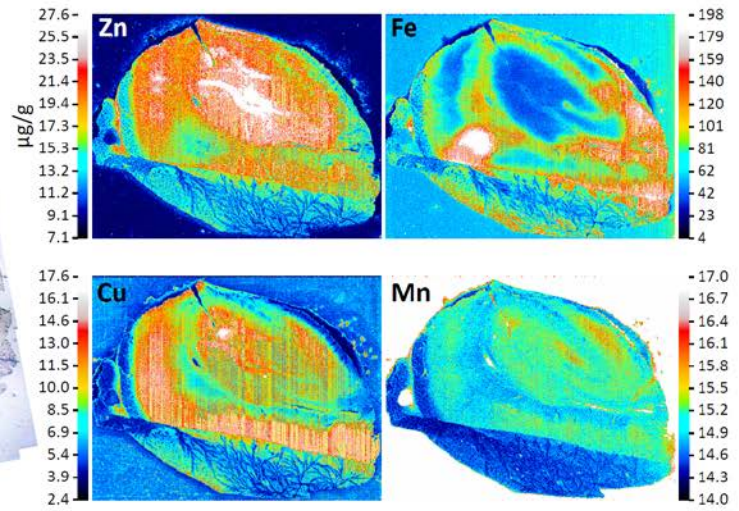

### Patient 3 (HS1)

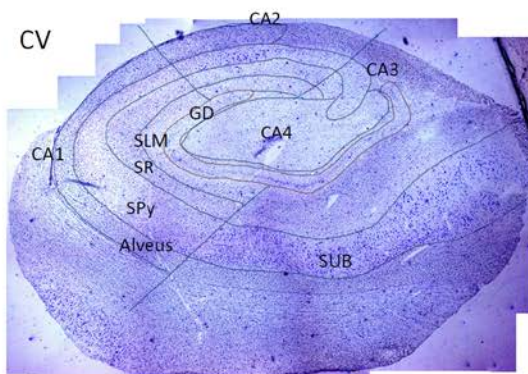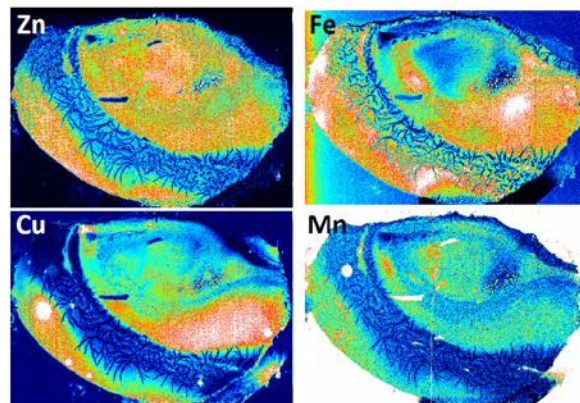

### Patient 4 (HS1)

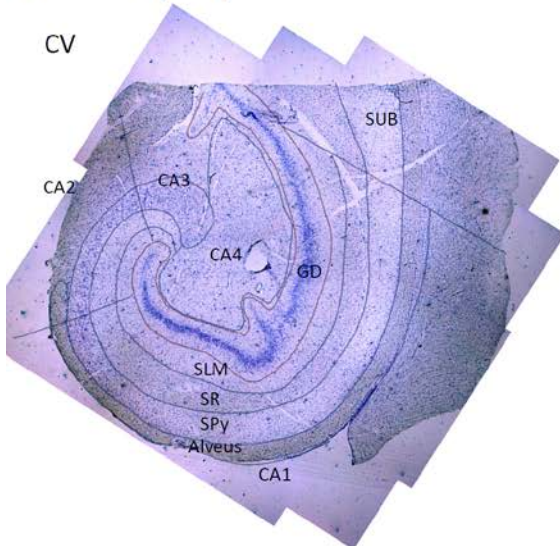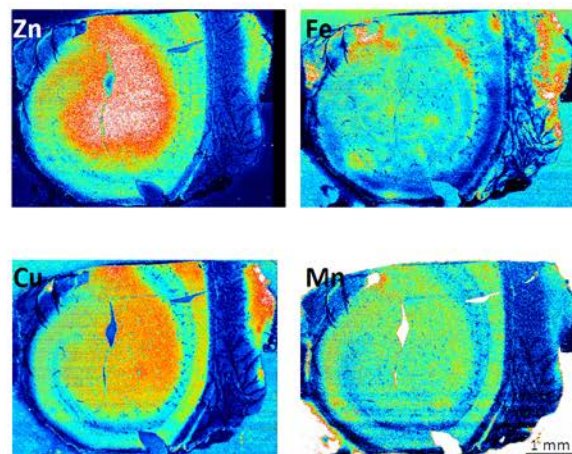

**Figure S2.** Micrographs (cresyl violet staining – CV) with delineated anatomical regions (left) and metal maps (Zn, Fe, Cu, and Mn; right) of coronal sections of sclerotic hippocampi. GD, gyrus dentatus (demarcated together with stratum moleculare, stratum granulosum and polymorphic layer); SUB, subiculum; SPY, stratum pyramidale; SR, stratum radiatum; SLM, strata lacunosum and moleculare; CA1–CA4, cornu Ammonis fields 1–4. Straight lines demarcate different fields of cornu Ammonis (CA1–CA3). Asterisk – CA1 SPy region with total neuronal loss in HS2. Total neuronal loss in Patient 3 and 4 was present in the entire SPy in CA1 and extended to other areas as well.
